# Supplementary figures and images for: Association among age, gender, menopausal status and small dense low-density lipoprotein cholesterol: a cross-sectional study
Source: PubMed Central journal article supplement — BMJ Open. 2021 Feb 4;11(2):e041613. doi: 10.1136/bmjopen-2020-041613 (PMC7925934; doi:10.1136/bmjopen-2020-041613), 2021-02-04

TC, mg/dL

Supplement Figure 1

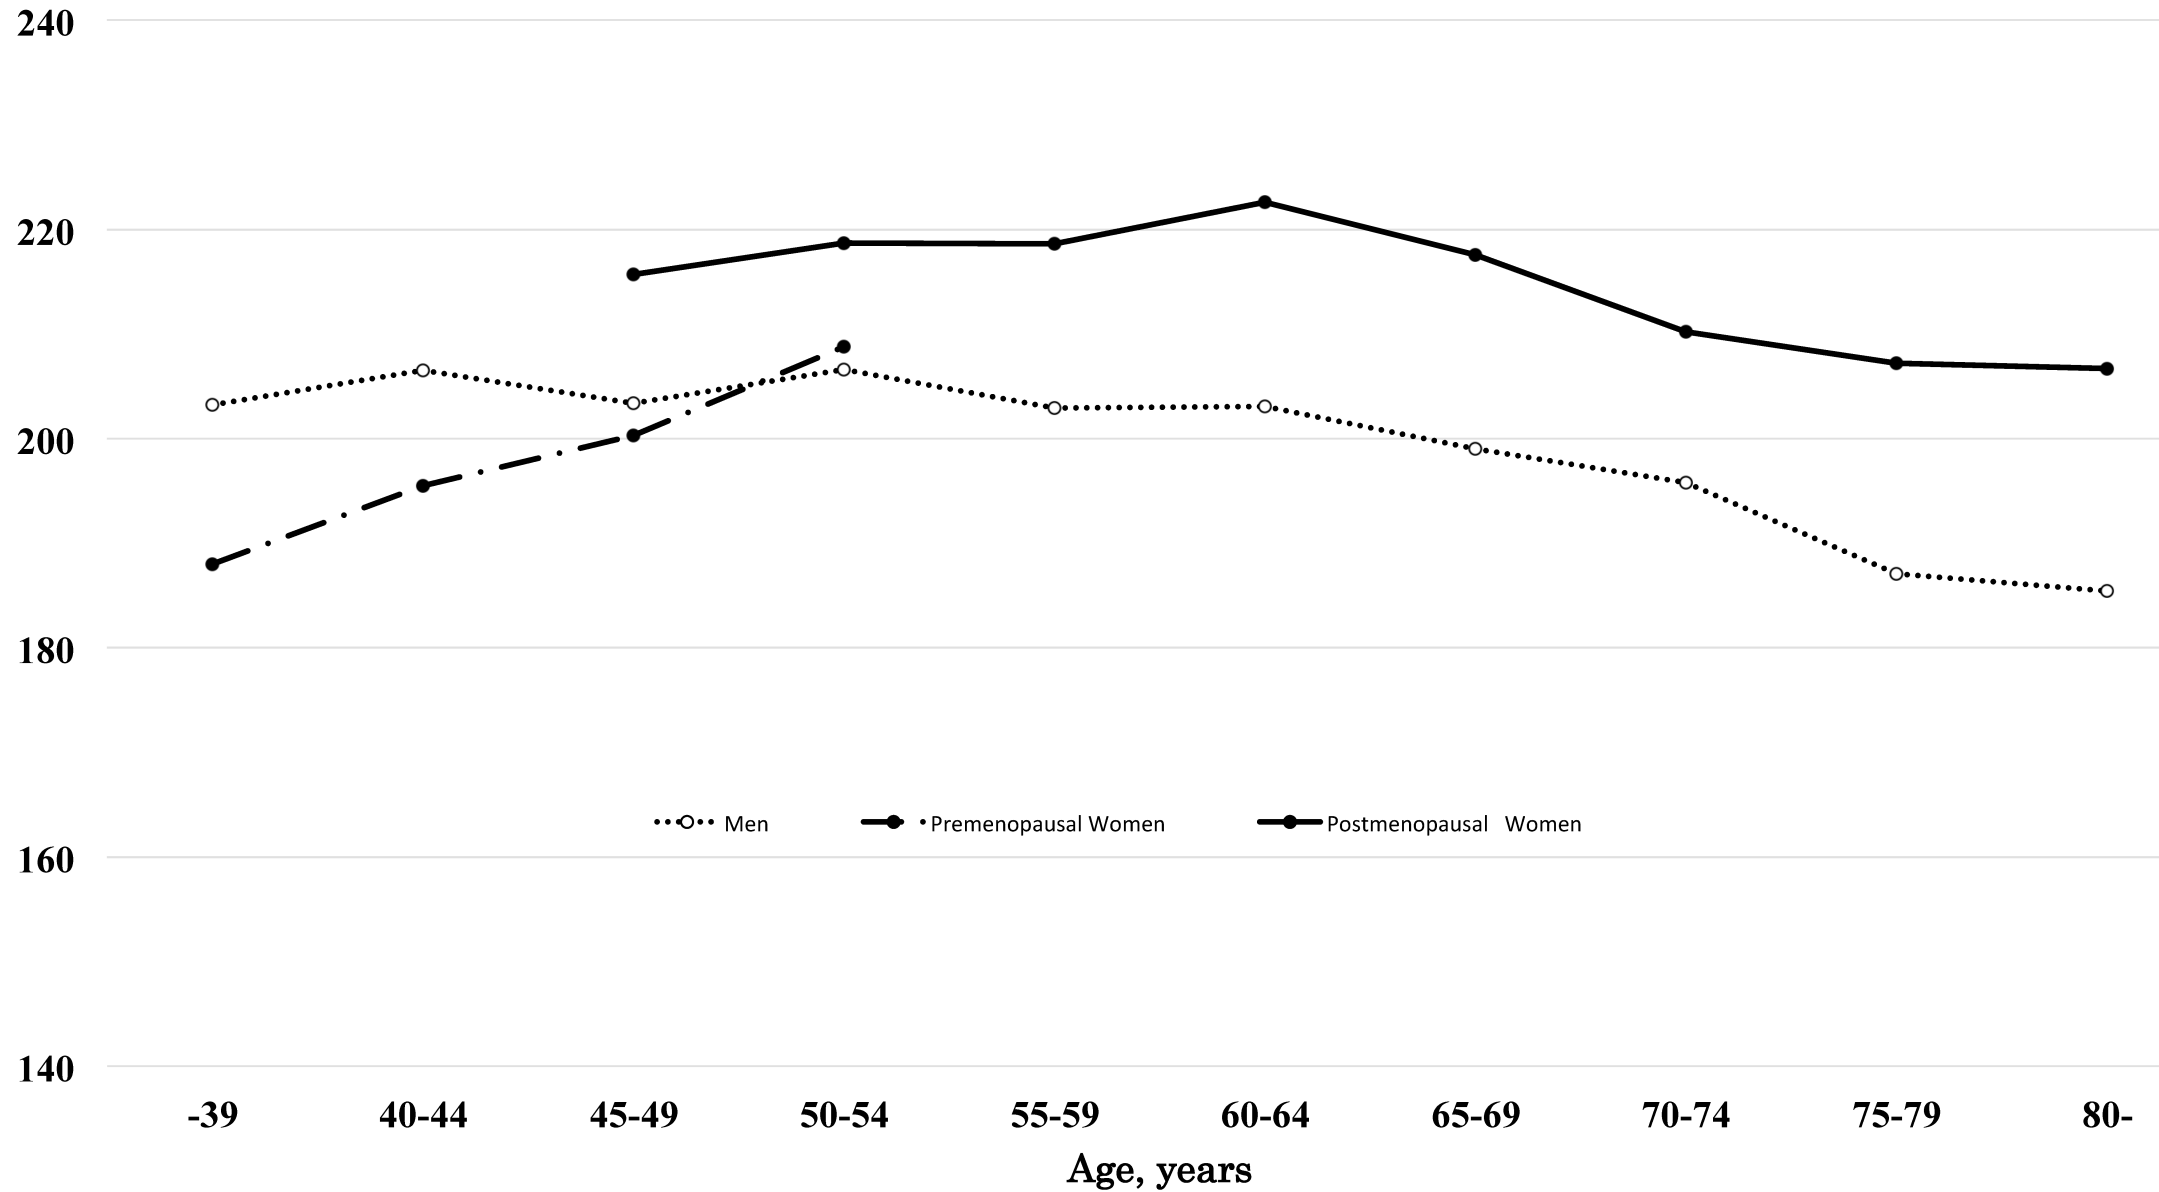

Supplement: bmjopen-2020-041613supp001.pdf [file bmjopen-2020-041613supp001.pdf]

nonHDL-C, mg/dL

Supplement Figure 2

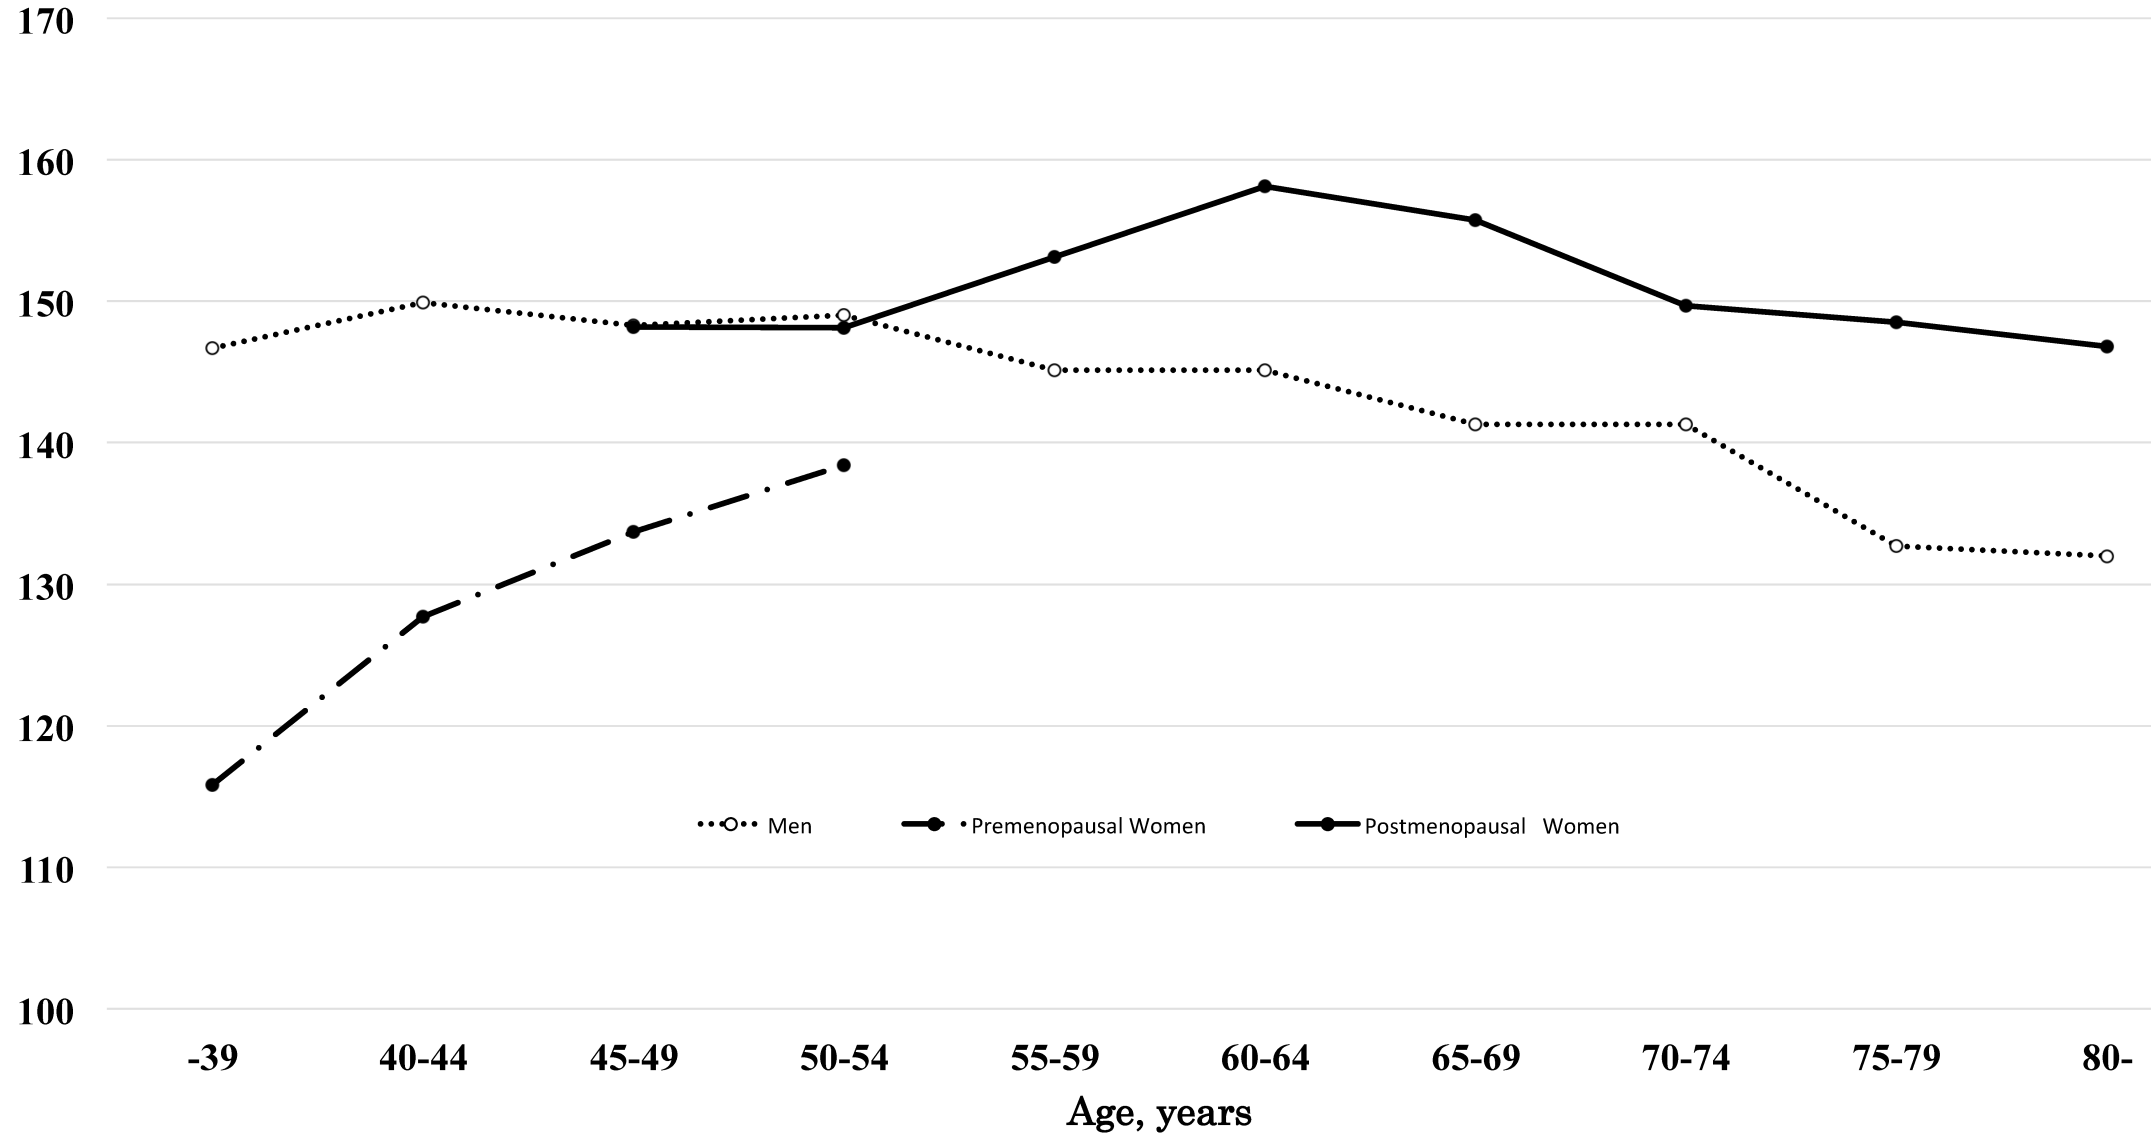

Supplement: bmjopen-2020-041613supp002.pdf [file bmjopen-2020-041613supp002.pdf]

**TC/HDL-C ratio**

**Supplement Figure 3**

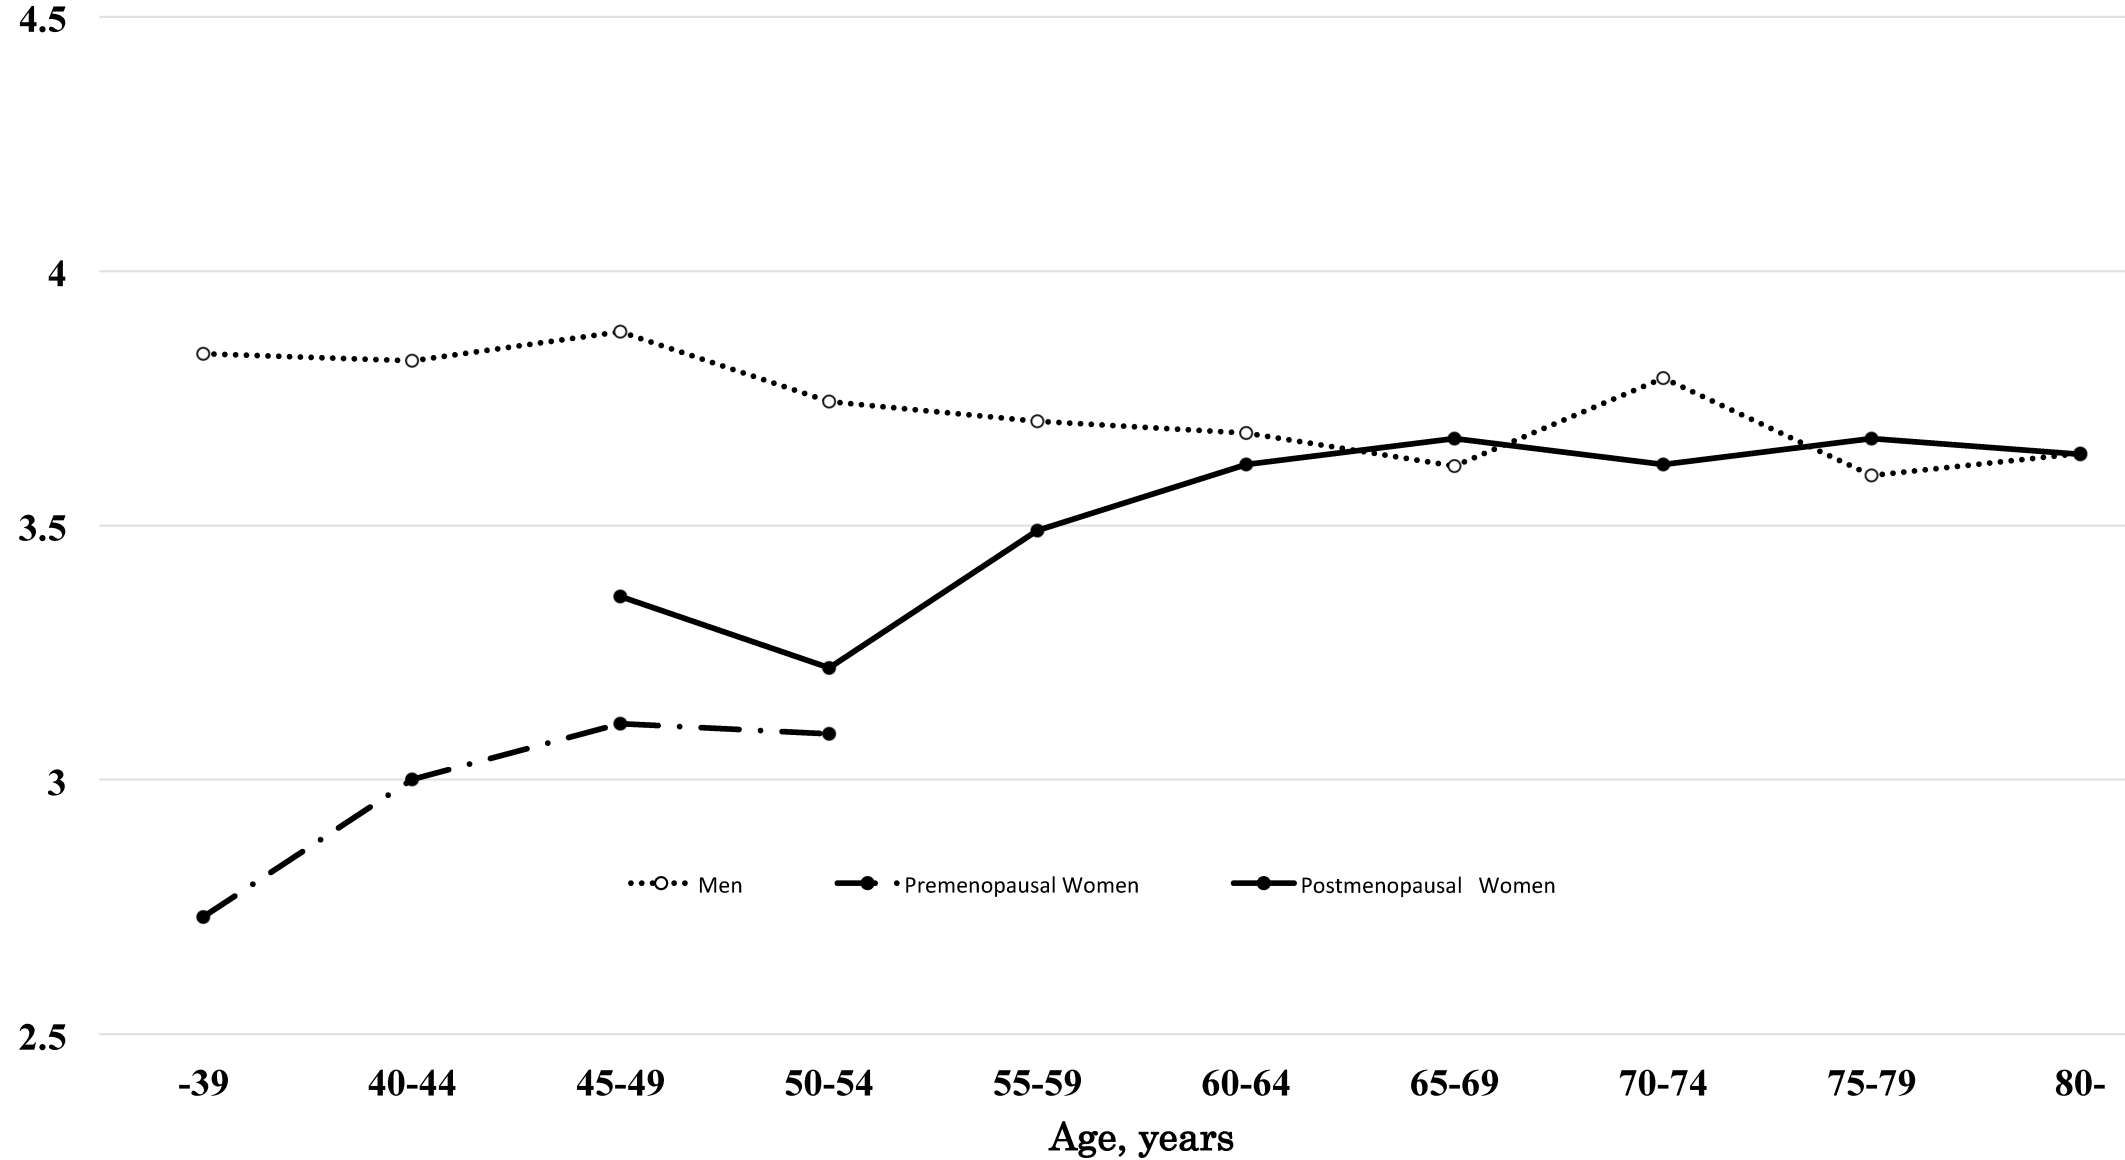

Supplement: bmjopen-2020-041613supp003.pdf [file bmjopen-2020-041613supp003.pdf]

Supplement Figure 4

TG, mg/dL

140  
130  
120  
110  
100  
90  
80  
70  
60  
50  
40

-39      40-44      45-49      50-54      55-59      60-64      65-69      70-74      75-79      80-

Age, years

••○•• Men      •●• Premenopausal Women      •●• Postmenopausal Women

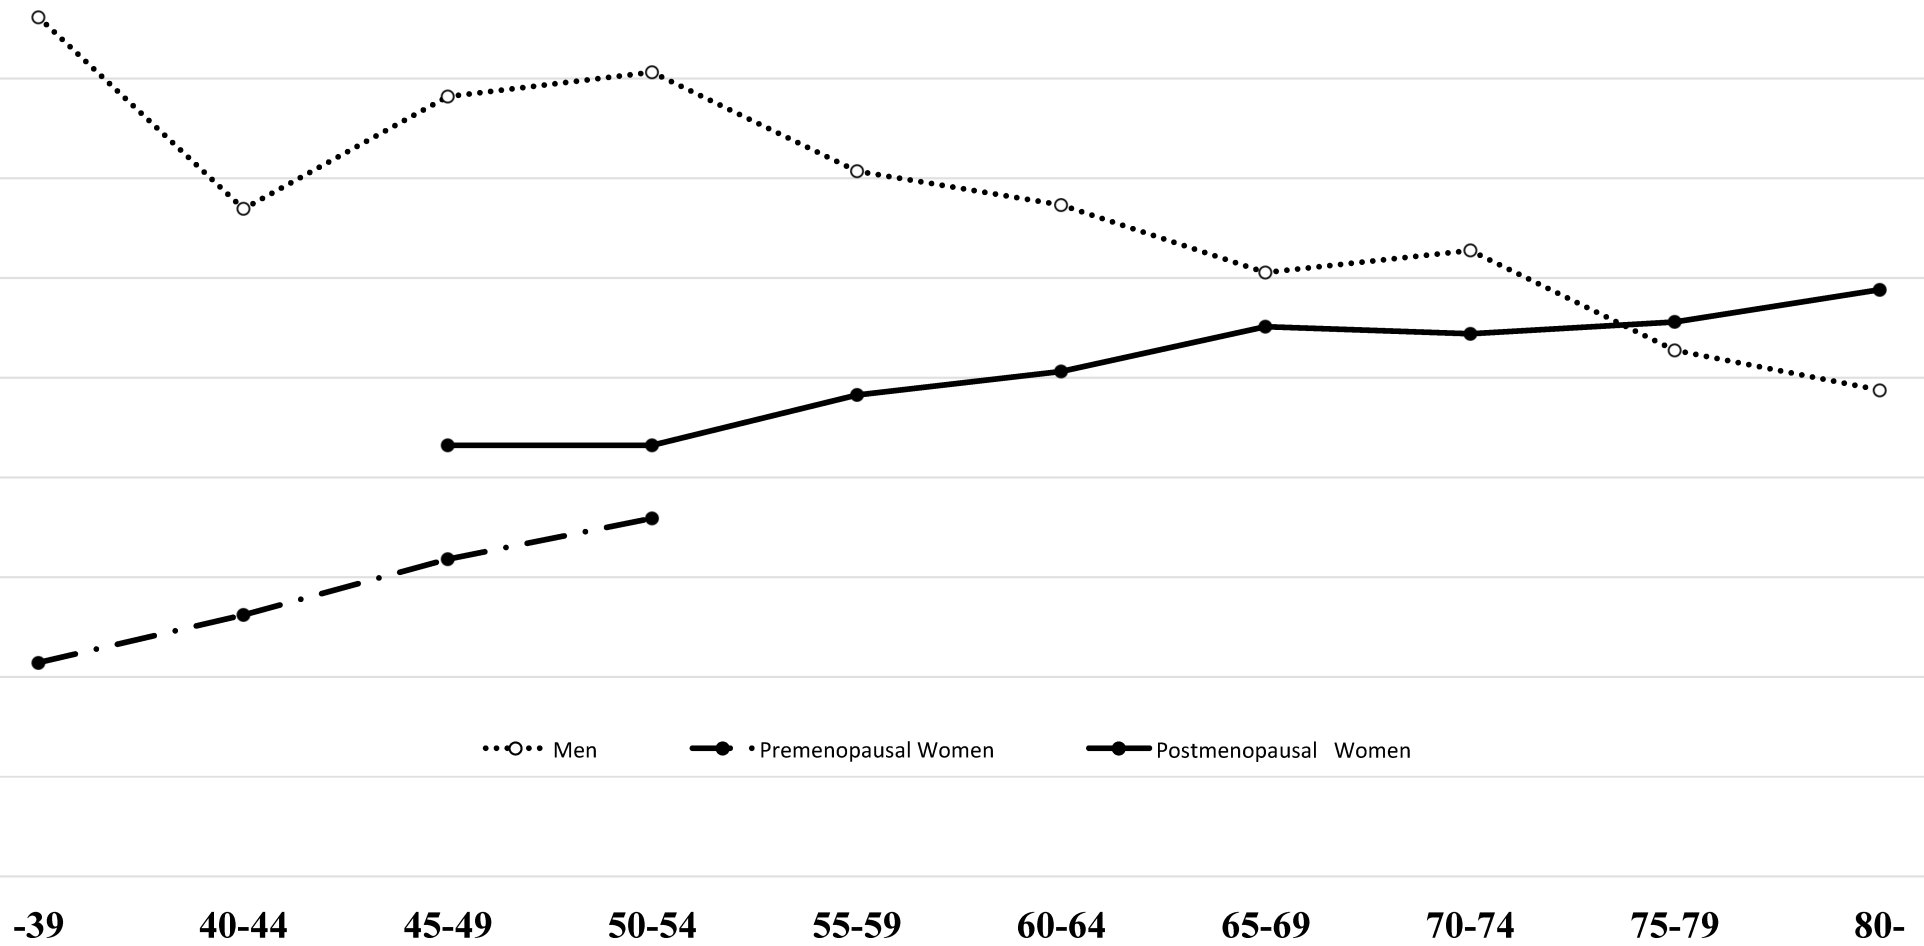

Supplement: bmjopen-2020-041613supp004.pdf [file bmjopen-2020-041613supp004.pdf]

# HDL-C, mg/dL

# Supplement Figure 5

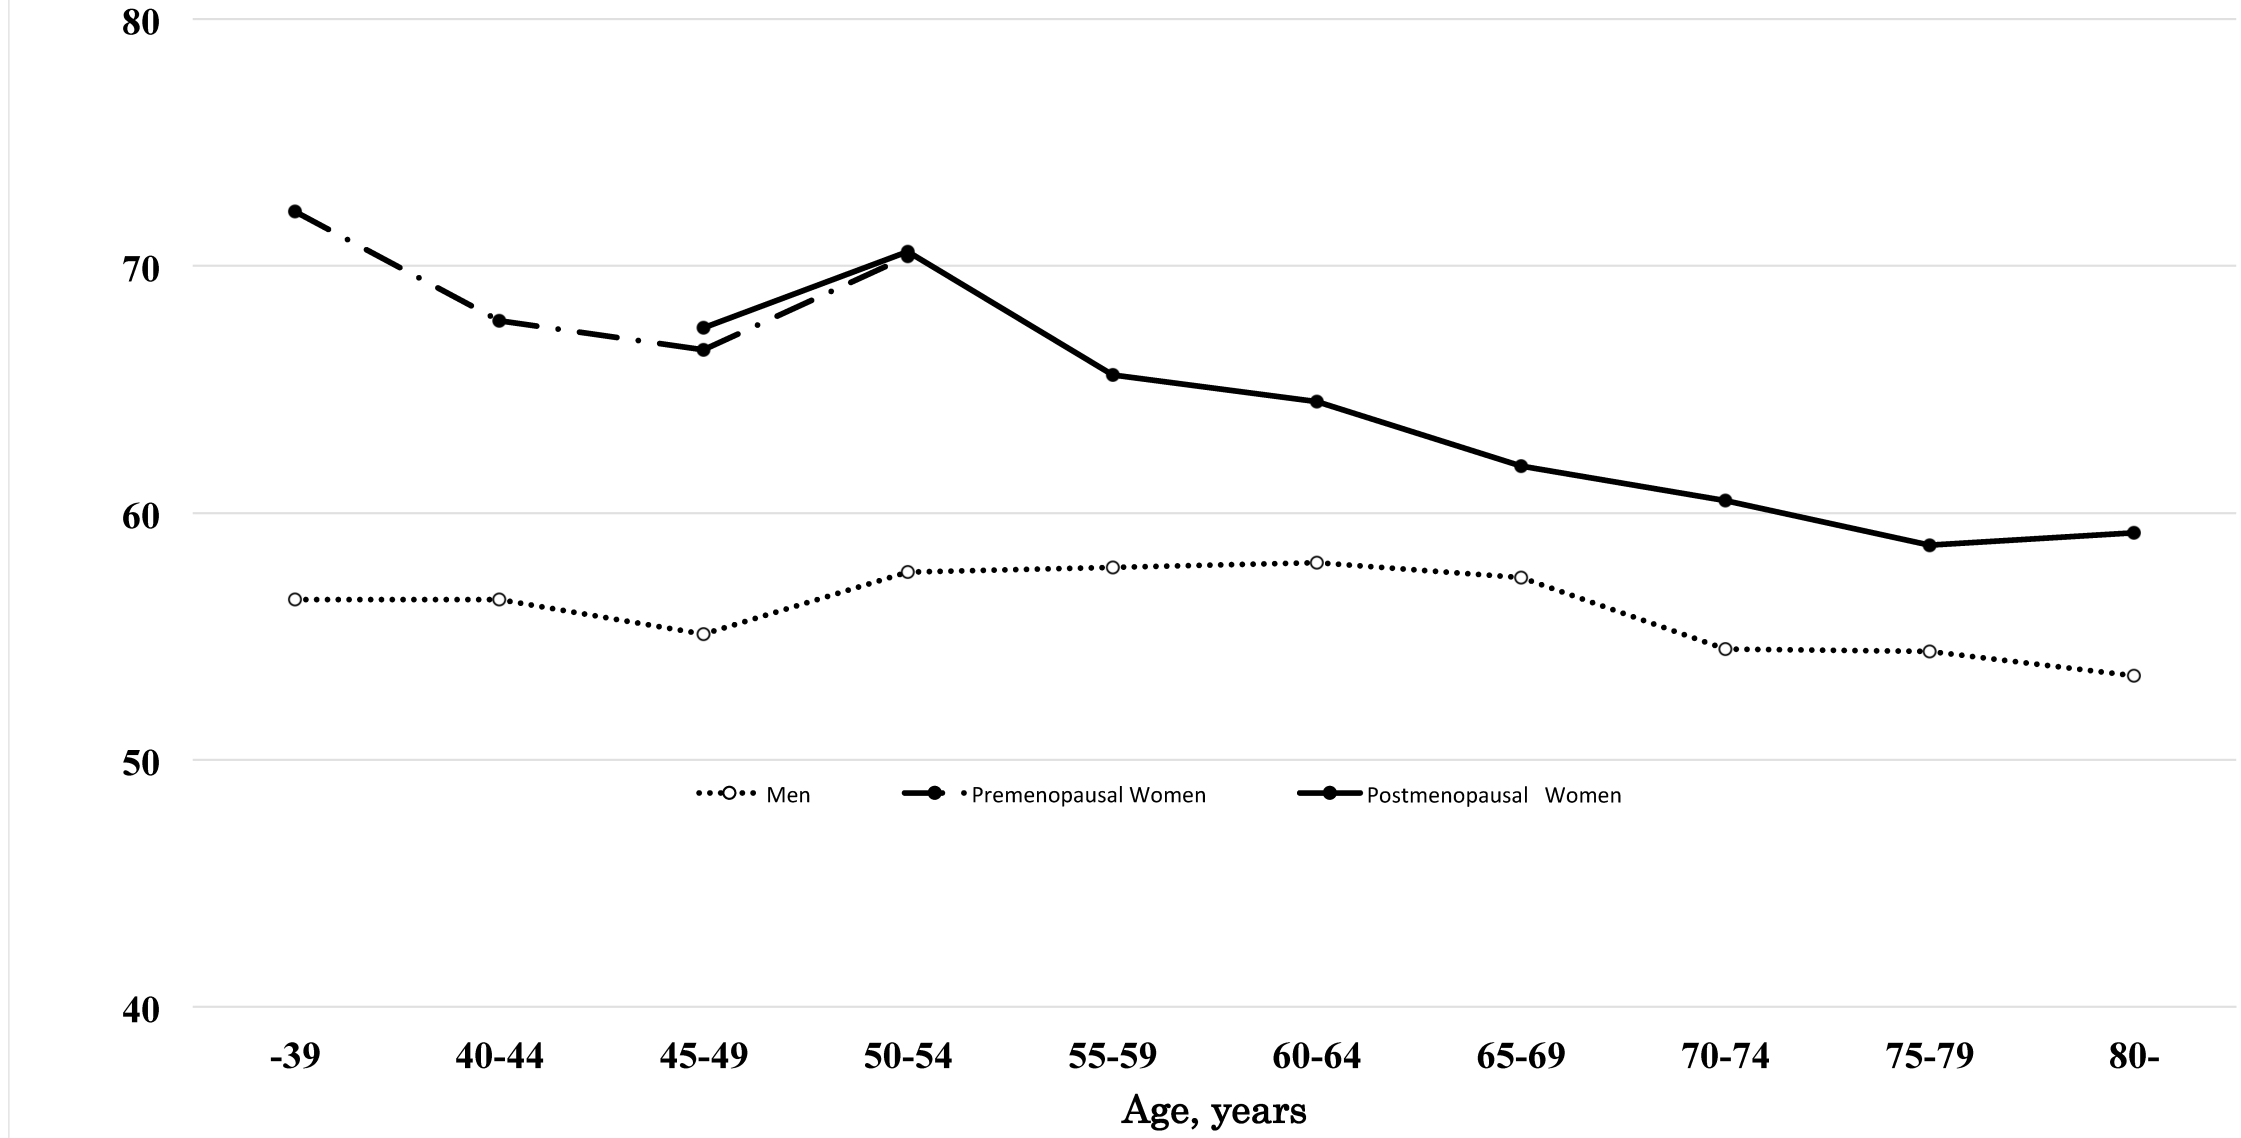

Supplement: bmjopen-2020-041613supp005.pdf [file bmjopen-2020-041613supp005.pdf]

SdLDL-C, mg/dL

Supplement Figure 6

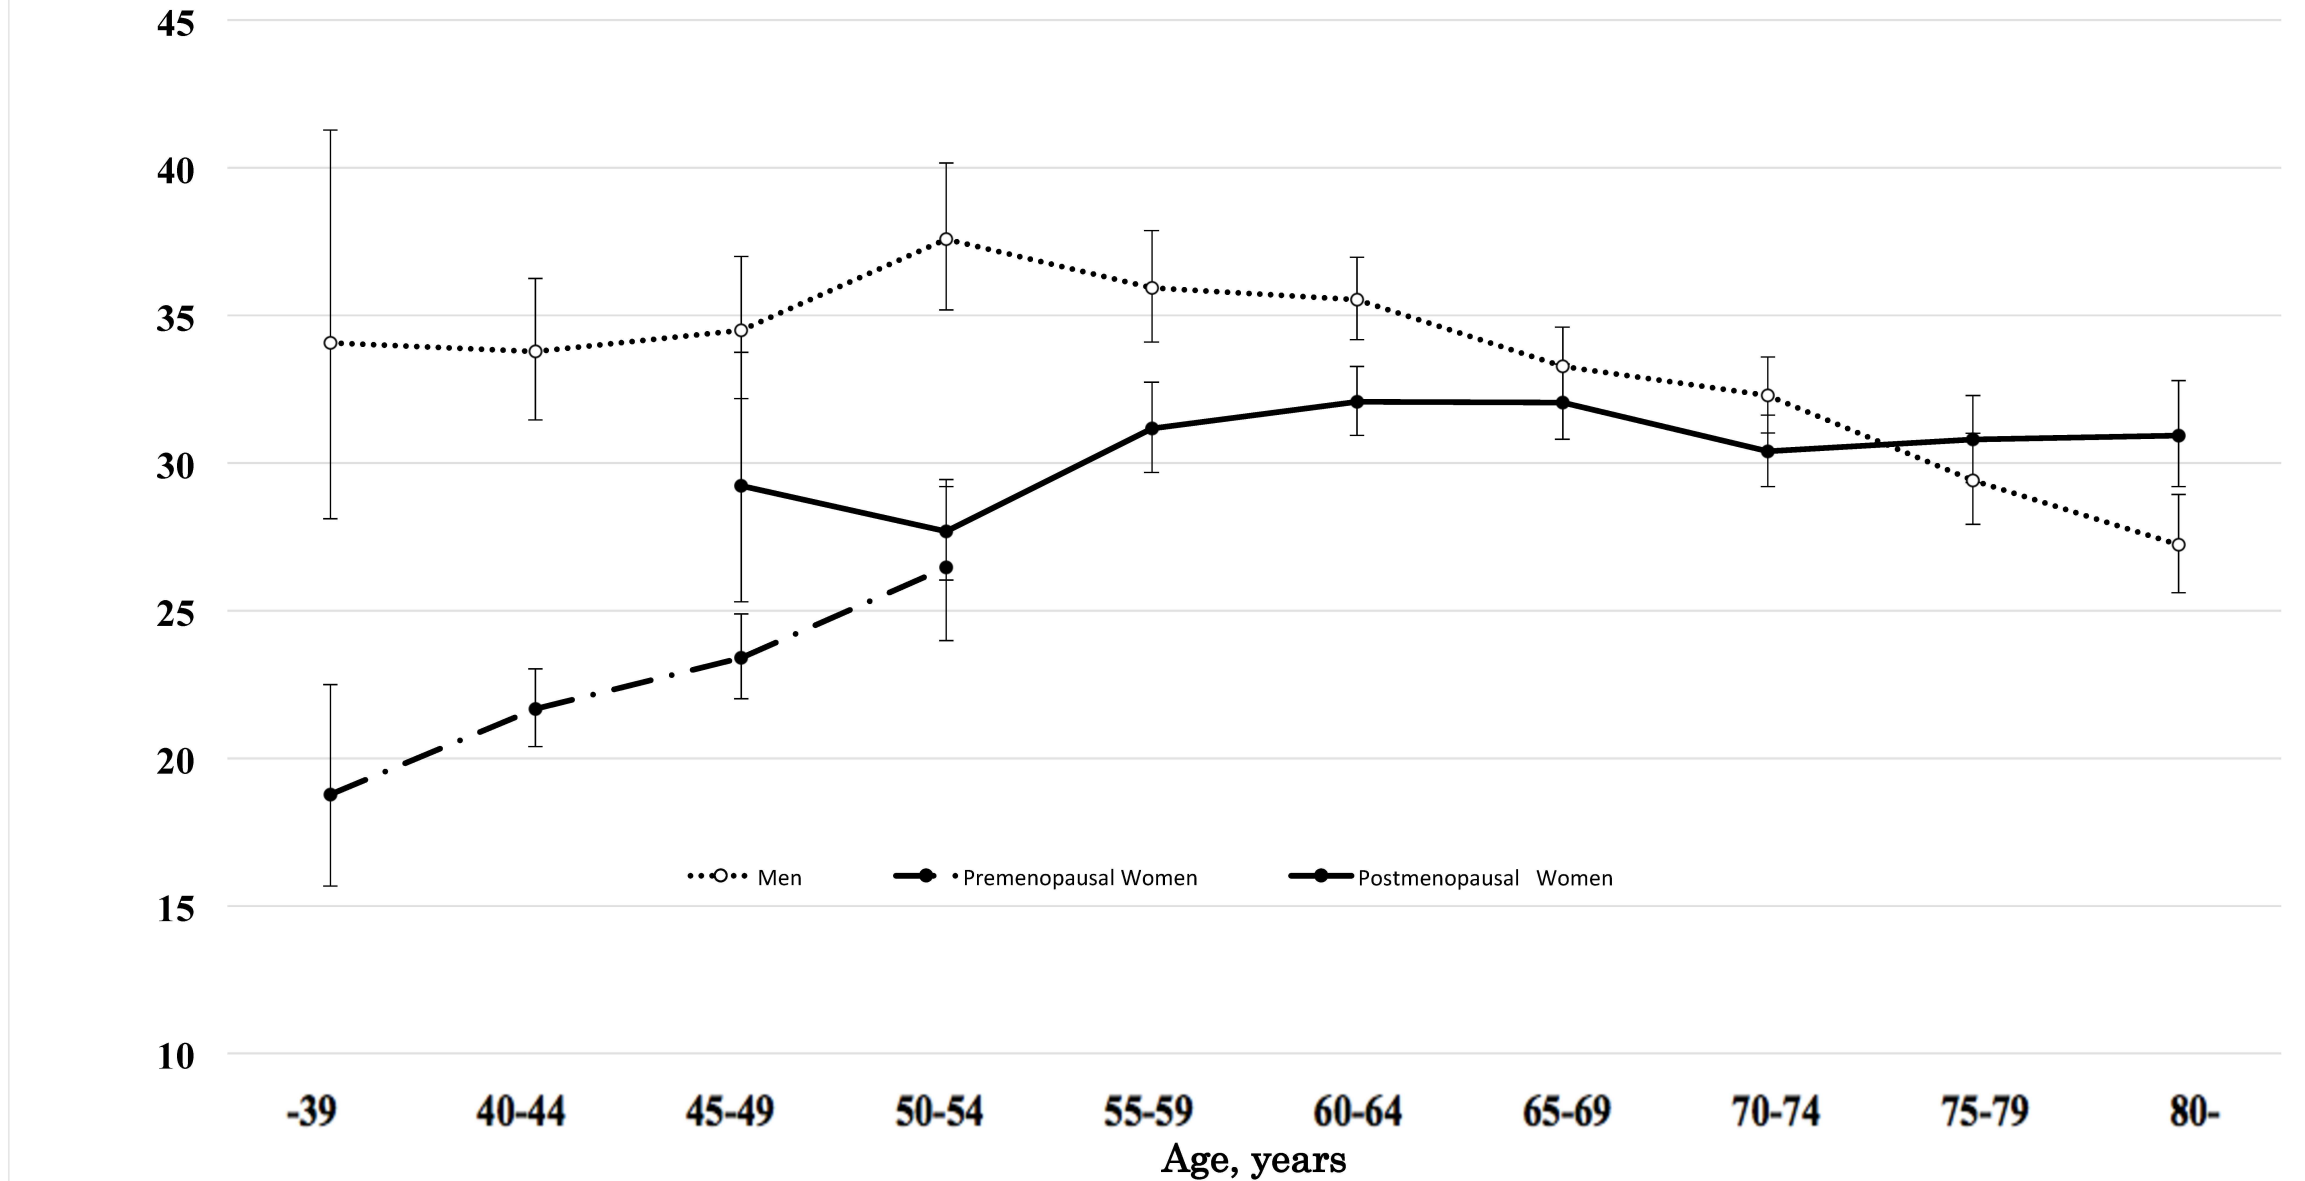

Supplement: bmjopen-2020-041613supp006.pdf [file bmjopen-2020-041613supp006.pdf]

## SdLDL-C/LDL-C ratio

## Supplement Figure 7

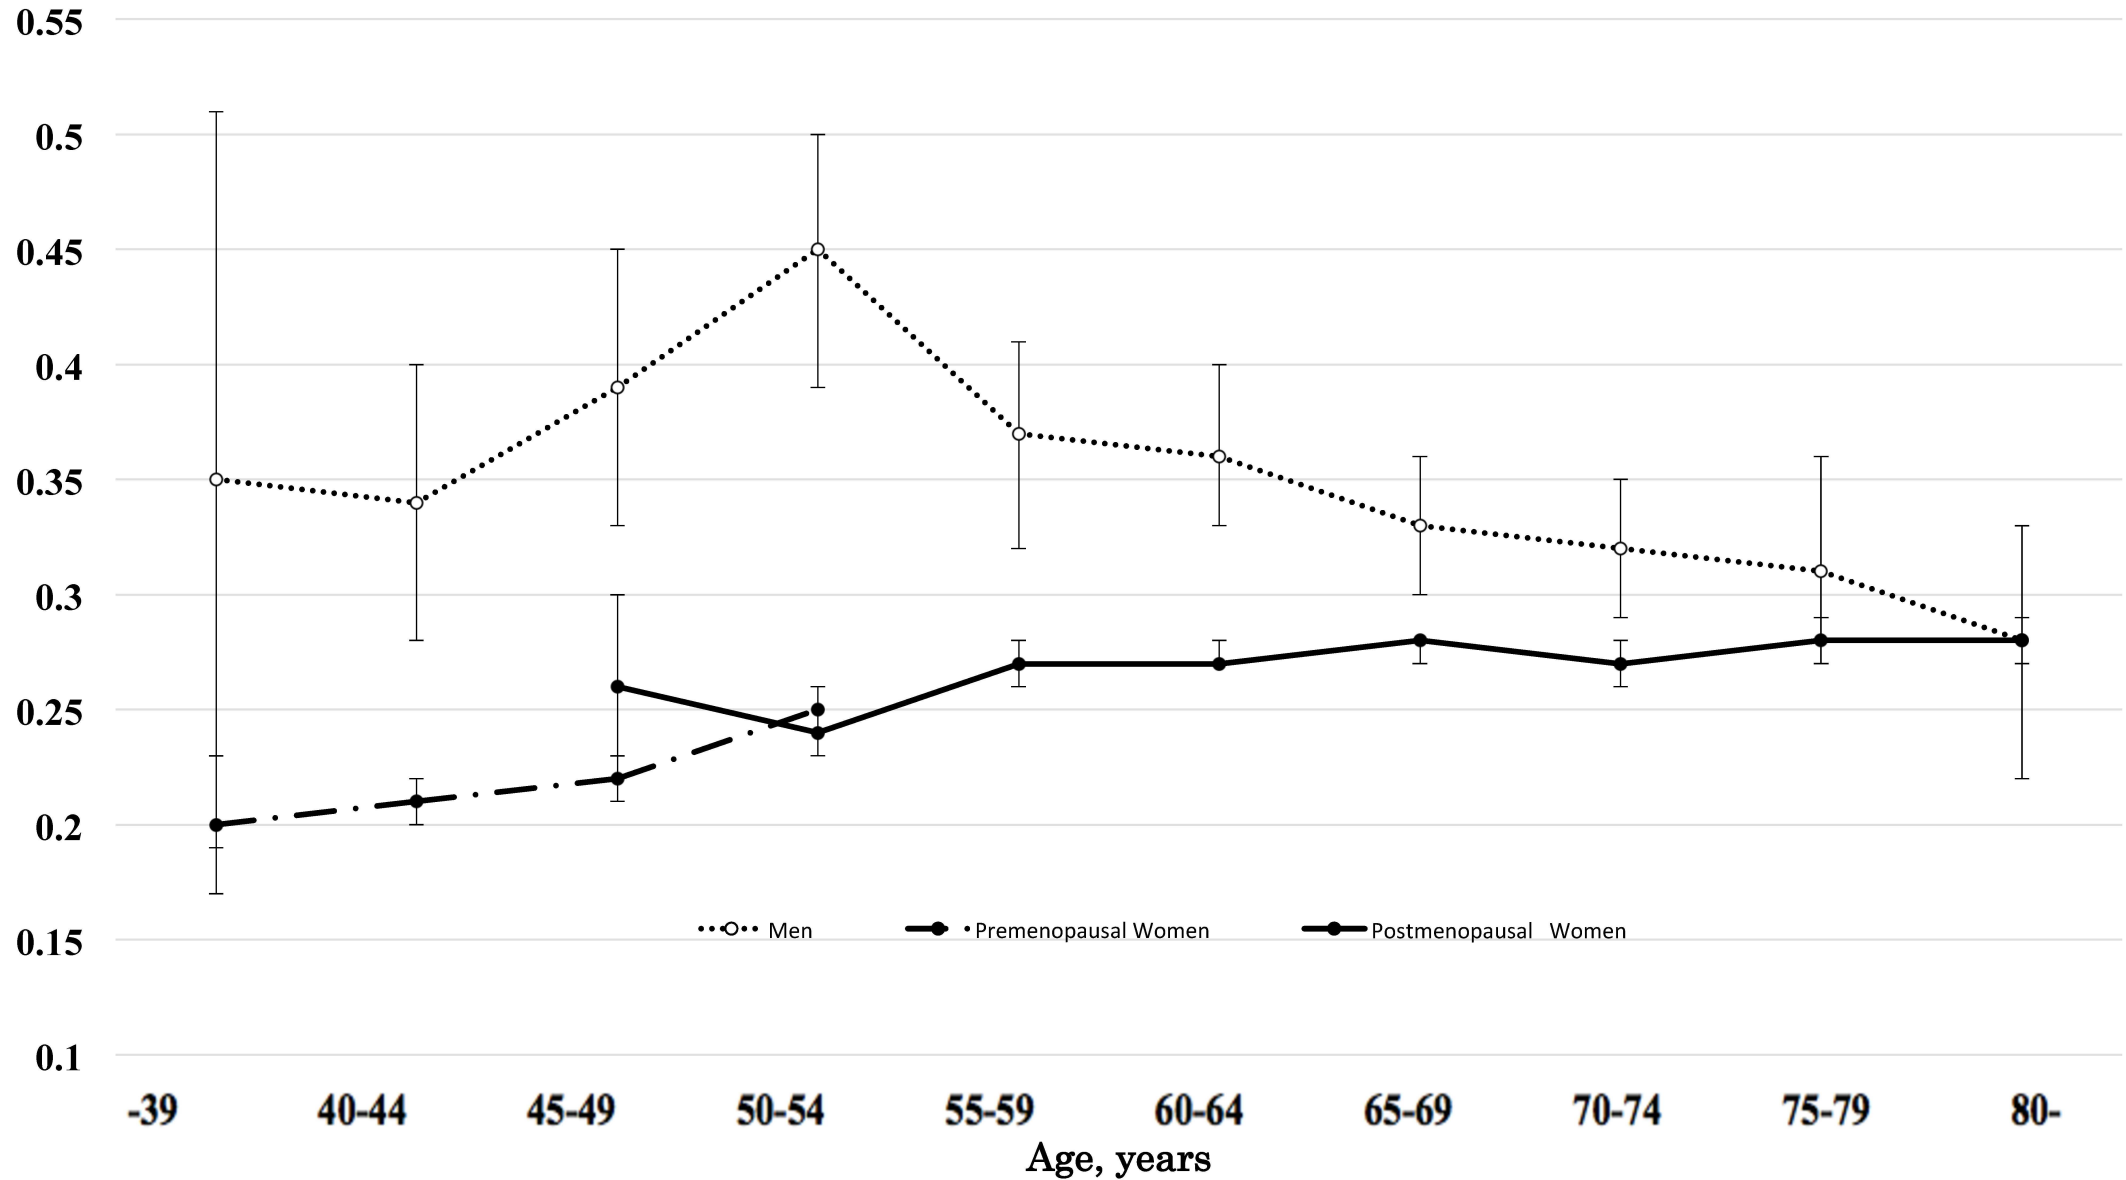

Supplement: bmjopen-2020-041613supp007.pdf [file bmjopen-2020-041613supp007.pdf]
